# Supplementary material
Source: Springer Nature journal article supplement (https://www.springermedizin.de/resource/supplementary/12916_2012_765_MOESM2_ESM.pdf/9598702)

## A. APP surface levels

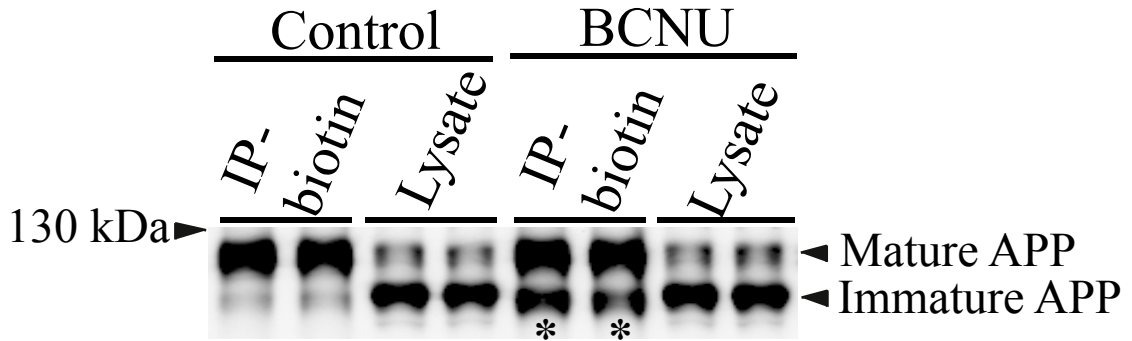

## B. Ratio of surface to total APP

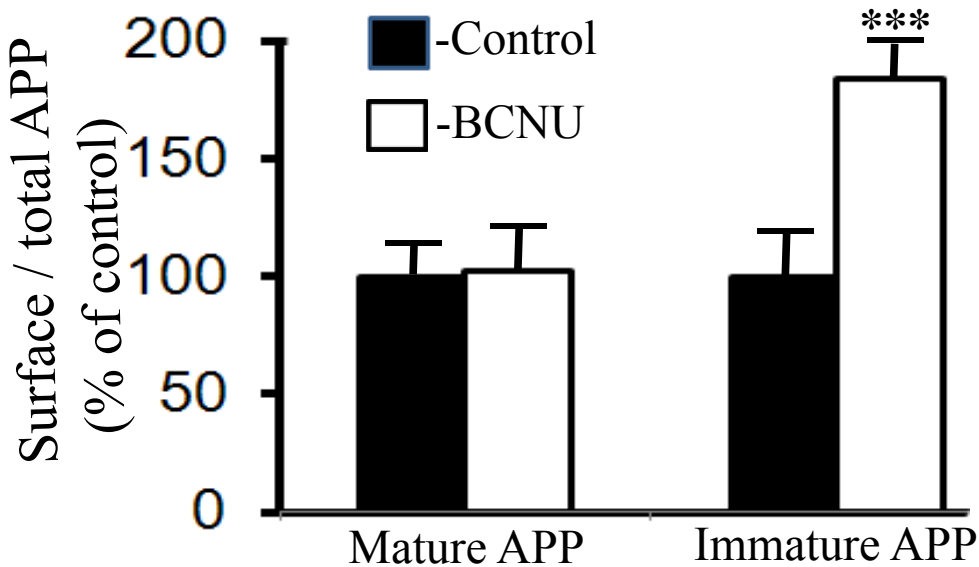

## C. APP stability

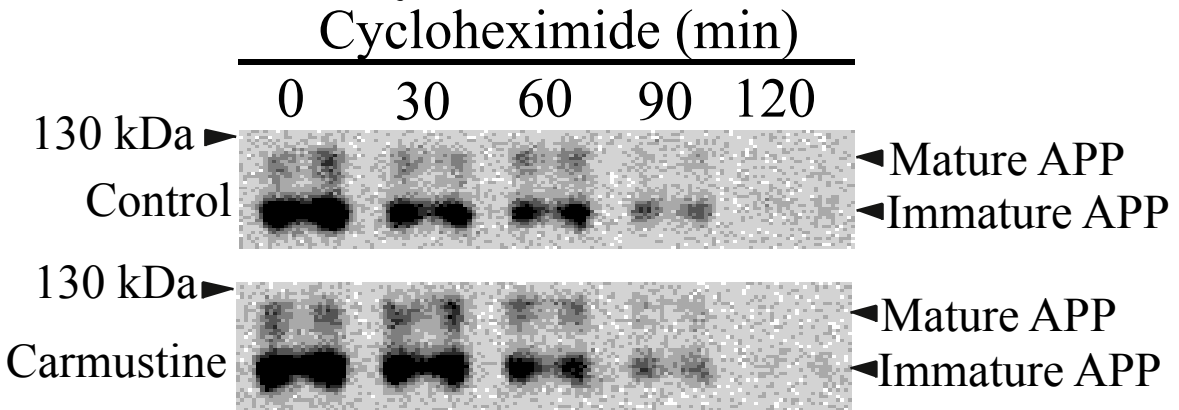

Supplement: MOESM2 [file 9598702]
